# Supplementary material for: Point-of-Care Biomarkers to Guide Antibiotic Prescription for Acute Febrile Illness in Sub-Saharan Africa: Promises and Caveats
Source: PubMed Central journal article supplement — Open Forum Infect Dis. 2020 Jun 30;7(8):ofaa260. doi: 10.1093/ofid/ofaa260 (PMC7423291; doi:10.1093/ofid/ofaa260), 2020-06-30
Supplement: ofaa260_suppl_supplementary_crp_table_s1.pdf [file ofaa260_suppl_supplementary_crp_table_s1.pdf]

|   | Type | Test name                               | picture                                                                             | Company                     | Qualitative, semi-quant or quantitative | price/test (USD) | Reading result after | Sample type                    | Sample volume | Storage   |
|---|------|-----------------------------------------|-------------------------------------------------------------------------------------|-----------------------------|-----------------------------------------|------------------|----------------------|--------------------------------|---------------|-----------|
| 1 | RDT  | hsCRP rapid whole blood test kit FaStep |    | Assure Tech (China)         | semi-quantitative                       | 0.40-1.00        | 5 min                | serum<br>plasma<br>whole blood | NA            | 2-30°C    |
| 2 | RDT  | Actim CRP                               |    | MediNA Biochemica (Finland) | semi-quantitative                       | 5.68             | 5 min                | whole blood                    | 10 µL         | 2-25 °C   |
| 3 | RDT  | BiosyneNA® CRP                          |    | BiosyneNA (France)          | semi-quantitative                       | NA               | 5 min                | serum<br>plasma<br>whole blood | 5 µL - 10 µL  | 2-30°C    |
| 4 | RDT  | BioNeNAia CRPplus                       |   | BiomerieuNA (France)        | semi-quantitative                       | NA               | 5 min                | whole blood                    | NA            | NA        |
| 5 | RDT  | OneStep CRP RapiCard InstaTest          |  | Cortez Diagnostics (USA)    | semi-quantitative                       | 3.95             | 10 min               | serum<br>plasma<br>whole blood | 25 µL         | 15°C-30°C |

|    |     |                                         |                                                                                     |                           |                   |         |        |                                |       |        |
|----|-----|-----------------------------------------|-------------------------------------------------------------------------------------|---------------------------|-------------------|---------|--------|--------------------------------|-------|--------|
| 6  | RDT | <b>Qualitative CRP rapid test</b>       | 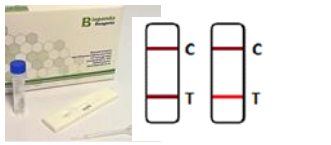   | Biopanda (UK)             | qualitative       | 1.12    | 5 min  | serum<br>plasma<br>whole blood | 10 µL | 2-30°C |
| 7  | RDT | <b>Semi-quantitative CRP rapid test</b> |    | Biopanda (UK)             | semi-quantitative | 1.13    | 5 min  | serum<br>plasma<br>whole blood | 10 µL | 2-30°C |
| 8  | RDT | <b>CRP DIAQUICK Test</b>                |    | Dialab (Austria)          | semi-quantitative | 0.99    | 5 min  | serum<br>plasma<br>whole blood | NA    | 2-30°C |
| 9  | RDT | <b>CRP serum rapid test</b>             |    | CreativeDiagnostics (USA) | qualitative       | 2.5     | 10 min | serum<br>plasma<br>whole blood | NA    | 4-30°C |
| 10 | RDT | <b>CRP serum whole blood rapid test</b> |    | CreativeDiagnostics (USA) | semi-quantitative | 2.5     | 10 min | serum                          | 25 µl | 2-30°C |
| 11 | RDT | <b>hs-CRP</b>                           |   | Bio-GP (China)            | semi-quantitative | 1.9-3.2 | 15 min | serum<br>plasma<br>whole blood | NA    | 4-30°C |
| 12 | RDT | <b>Screen CRP test</b>                  |  | ScreenItalia (Italia)     | semi-quantitative | 1.04    | 5 min  | serum<br>plasma<br>whole blood | 10 µL | 2-30°C |

|    |     |                              |                                                                                     |                                   |                   |             |        |                                |       |         |
|----|-----|------------------------------|-------------------------------------------------------------------------------------|-----------------------------------|-------------------|-------------|--------|--------------------------------|-------|---------|
| 13 | RDT | <b>CRP-Check 1 MINI CLIP</b> |    | VedaLab (France)                  | qualitative       | 1.62        | 5 min  | serum<br>plasma<br>whole blood | 50 µL | 4-30°C  |
| 14 | RDT | <b>CRP-Check-1</b>           |    | VedaLab (France)                  | semi-quantitative | NA          | 10 min | serum<br>plasma<br>whole blood | 20 µL | 4-30°C  |
| 15 | RDT | <b>FebriDNA (CRP + MNA)</b>  |    | RPS Diagnostics (US)              | qualitative       | 11.16-16.74 | 10 min | fingerstick<br>whole blood     | 5 µL  | RT      |
| 16 | RDT | <b>Cleartest CRP strips</b>  |    | ServopraNA (Germany)              | semi-quantitative | 2.79        | 5 min  | serum<br>plasma<br>whole blood | 11 µL | 2-30°C  |
| 17 | RDT | <b>3-linien CRP test</b>     |  | Diagnostik-Nord (German) (Abbott) | semi-quantitative | 2.18        | 5 min  | serum<br>plasma<br>whole blood | 10 µL | 2-30 °C |
| 18 | RDT | <b>BioFAST CRP</b>           | no picture                                                                          | Biotron (US)                      | semi-quantitative | NA          | NA     | serum<br>whole blood           | NA    | NA      |

|    |                       |                                                          |                                                                                     |                                    |                   |         |        |                                |            |        |
|----|-----------------------|----------------------------------------------------------|-------------------------------------------------------------------------------------|------------------------------------|-------------------|---------|--------|--------------------------------|------------|--------|
| 19 | RDT                   | CRP                                                      |    | Ntbio<br>(Canada)                  | semi-quantitative | 2.0     | 5 min  | serum<br>plasma                | NA         | NA     |
| 20 | RDT                   | CRP                                                      |    | Goldenmed<br>Biomedical<br>(China) | qualitative       | 0.5-0.6 | 10 min | serum<br>plasma<br>whole blood | 1 -3 drops | NA     |
| 21 | RDT                   | <b>C-reactive Protein<br/>Test Strip<br/>(Quad Line)</b> | no picture                                                                          | BTNNA<br>(Canada)                  | semi-quantitative | NA      | 5 min  | serum<br>plasma<br>whole blood | NA         | 2-30°C |
| 22 | RDT                   | <b>C-reactive Protein<br/>Test Strip<br/>(Tri Line)</b>  | no picture                                                                          | BTNNA<br>(Canada)                  | semi-quantitative | NA      | 10 min | serum<br>plasma<br>whole blood | NA         | 2-30°C |
| 23 | RDT                   | <b>C-reactive Protein<br/>Test Strip<br/>(Dual Line)</b> | no picture                                                                          | BTNNA<br>(Canada)                  | qualitative       | NA      | 10 min | serum<br>plasma<br>whole blood | NA         | 2-30°C |
| 24 | RDT                   | <b>Standard Q<br/>Malaria/CRP<br/>duo test</b>           | no picture                                                                          | SD Biosensor<br>(Korea)<br>FIND    | qualitative       | NA      | NA     | fingerprick<br>blood           | NA         | NA     |
| 25 | RDT                   | <b>AllTest CRP<br/>Qualitative Rapid<br/>Test</b>        |  | AllTest<br>(China)                 | qualitative       | 1.27    | 5 min  | serum<br>plasma<br>whole blood | 10 µL      | 2-30°C |
| 26 | RDT<br>with<br>reader | <b>hsCRP Rapid Test<br/>with CD Quant<br/>reader</b>     |  | CreativeDiagnostics<br>(USA)       | quantitative      | NA      | 15 min | whole blood                    | 10 µL      | 2-27°C |

|    |                          |                                    |                                                                                     |                                     |                                       |      |          |                                |                                              |                    |
|----|--------------------------|------------------------------------|-------------------------------------------------------------------------------------|-------------------------------------|---------------------------------------|------|----------|--------------------------------|----------------------------------------------|--------------------|
| 27 | RDT with reader          | <b>Quantitative CRP Rapid test</b> |    | Biopanda (UK)                       | quantitative                          | 1.63 | 5-20 min | serum<br>plasma<br>whole blood | 5 µl (whole blood)<br>2.5 µl (serum, plasma) | 2-30°C             |
| 28 | RDT with reader          | <b>Quantum Blue CRP</b>            |    | Buhlmann laboratories (Switzerland) | quantitative                          | NA   | 22 min   | serum                          | 15 µL                                        | 2-8°C              |
| 29 | RDT optional with reader | <b>NADAL® CRP Quant test</b>       |    | nal von Minden (Germany)            | semi-quantitative<br><br>quantitative | 3.23 | 5 min    | serum<br>plasma<br>whole blood | 5 µL                                         | 2-30°C             |
| 30 | RDT with reader          | <b>Standard F CRP</b>              |   | SD Biosensor (Korea)                | quantitative                          | NA   | 3 min    | serum<br>plasma<br>whole blood | 5 µL                                         | 2-30°C (18 months) |
| 31 | RDT with reader          | <b>MultiCare CRP</b>               |  | SD Biosensor (Korea)                | quantitative                          |      | 3 min    | serum<br>plasma<br>whole blood | 5 µL                                         | 2-30°C (18 months) |

|    |                 |                             |                                                                                     |                                 |              |      |        |                                |        |                                                      |
|----|-----------------|-----------------------------|-------------------------------------------------------------------------------------|---------------------------------|--------------|------|--------|--------------------------------|--------|------------------------------------------------------|
| 32 | RDT with reader | <b>NycoCard CRP</b>         |    | Alere (Abbott) global           | quantitative | 4.84 | 3 min  | serum<br>plasma<br>whole blood | 5 µL   | 2-8°C                                                |
| 33 | RDT with device | <b>CRP-Check</b>            |    | VedaLab (France)                | quantitative | NA   | 10 min | serum<br>plasma<br>whole blood | 20 µL  | 4-30°C                                               |
| 34 | RDT with device | <b>Afinion CRP</b>          |    | Alere (Abbott) global           | quantitative | 5.68 | 3 min  | serum<br>plasma<br>whole blood | 2.5 µL | 4 weeks @ RT<br><br>until the eNApiiry date at 2-8°C |
| 35 | RDT with device | <b>CRP test</b>             |   | Eurolyser Diagnostics (Austria) | quantitative | NA   | NA     | serum<br>whole blood           | 5 µL   | 2 - 8 °C                                             |
| 36 | RDT with device | <b>Quikread go easy CRP</b> |  | OrionDiagnostics (Finland)      | quantitative | 3.94 | 2 min  | serum<br>plasma<br>whole blood | 10 µL  | 2-25°C                                               |
| 37 | RDT with device | <b>Quikread go CRP</b>      |  | OrionDiagnostics (Finland)      | quantitative | 3.94 | 2 min  | serum<br>plasma<br>whole blood | 20 µL  | 2-8°C<br>(18-25°C for 24h-1 month)                   |

|    |                 |                                    |                                                                                    |                            |              |      |       |                                |       |                       |
|----|-----------------|------------------------------------|------------------------------------------------------------------------------------|----------------------------|--------------|------|-------|--------------------------------|-------|-----------------------|
| 38 | RDT with device | <b>Quikread go wrCRP</b>           |   | OrionDiagnostics (Finland) | quantitative | 4.02 | 2 min | serum<br>plasma<br>whole blood | 10 µL | 2 - 25 °C             |
| 39 | RDT with device | <b>spinit CRP</b>                  |   | Biosurfit (Portugal)       | quantitative | 6.25 | 4 min | serum<br>plasma<br>whole blood | 5 µL  | 2-8 °C<br>(12 months) |
| 40 | RDT with device | <b>CRP Rapid Quantitative Test</b> |   | Lansionbio (China)         | quantitative | 0.4  | NA    | serum<br>plasma<br>whole blood | NA    | 4-30 °C               |
| 41 | RDT with device | <b>ichroma CRP test</b>            |   | ichroma (Austria)          | quantitative | 4.47 | 3 min | serum<br>plasma<br>whole blood | 10 µL | NA                    |
| 42 | RDT with device | <b>AFIAS FLENA CRP assay</b>       |  | Boditech Med (Korea)       | quantitative | NA   | 3 min | serum<br>plasma<br>whole blood | 10 µL | 2-8 °C<br>(20 months) |

**Table S1: Detailed overview of point of care tests for CRP available on the market.** On-line search for CRP tests was done between May and July 2019. RDTs (rapid diagnostic test) without or with a reader (handheld, < 0.800 kg) or a device (bench model, > 0,800 kg) for qualitative detection; semi-quantitative or quantitative detection. NA: data not available.
