# Supplementary material for: Point-of-Care Biomarkers to Guide Antibiotic Prescription for Acute Febrile Illness in Sub-Saharan Africa: Promises and Caveats
Source: PubMed Central journal article supplement — Open Forum Infect Dis. 2020 Jun 30;7(8):ofaa260. doi: 10.1093/ofid/ofaa260 (PMC7423291; doi:10.1093/ofid/ofaa260), 2020-06-30
Supplement: ofaa260_suppl_supplementary_pct_table_s1.pdf [file ofaa260_suppl_supplementary_pct_table_s1.pdf]

|   | Type | Test name                         | Picture                                                                             | Company                    | Qualitative, semi-quant or quantitative | price/test (USD) | Reading result after | Sample type              | Sample volume | Storage |
|---|------|-----------------------------------|-------------------------------------------------------------------------------------|----------------------------|-----------------------------------------|------------------|----------------------|--------------------------|---------------|---------|
| 1 | RDT  | <b>Screen Procalcitonina test</b> |    | ScreenItalia (Italia)      | qualitative                             | 3.24             | 20 min               | Serum Plasma             | 25-50 $\mu$ L | 2-30°C  |
| 2 | RDT  | <b>PCT</b>                        |    | ntbio (Canada)             | semi-quantitative                       | 2.00             | 10 min               | Serum Plasma             | 80 $\mu$ L    | NA      |
| 3 | RDT  | <b>PCT</b>                        |    | Accumed Technology (China) | qualitative                             | 0.10-5.00        | 15 min               | serum plasma whole blood | NA            | NA      |
| 4 | RDT  | <b>One Step PCT</b>               |   | Artron Labs (Canada)       | semi-quantitative                       | 0.89-1.09        | 30 min               | Serum Plasma             | 120 $\mu$ L   | 2-30°C  |
| 5 | RDT  | <b>FaStep PCT</b>                 |  | Assure Tech (China)        | qualitative                             | 1.09             | NA                   | serum plasma whole blood | NA            | NA      |

|    |                 |                                  |                                                                                     |                         |                   |      |        |                          |        |          |
|----|-----------------|----------------------------------|-------------------------------------------------------------------------------------|-------------------------|-------------------|------|--------|--------------------------|--------|----------|
| 6  | RDT             | <b>PCT Rapid test</b>            |    | Biopanda (UK)           | qualitative       | 1.58 | NA     | serum plasma             | NA     | 2-30°C   |
| 7  | RDT             | <b>PCT Rapid test</b>            |    | Biopanda (UK)           | qualitative       | 2.15 | NA     | serum plasma whole blood | NA     | 2-30°C   |
| 8  | RDT             | <b>PCT rapid diagnostic test</b> | no picture                                                                          | BioSino (China)         | qualitative       | NA   | NA     | serum plasma whole blood | NA     | NA       |
| 9  | RDT             | <b>PCT Rapid Test Kits</b>       |    | BlueCross (China)       | qualitative       | NA   | 10 min | serum plasma whole blood | NA     | NA       |
| 10 | RDT             | <b>B·R·A·H·M·S PCT-Q</b>         |    | ThermoFisher Scientific | Semi-quantitative | 15.8 | 30 min | serum plasma             | 200 µL | 2 – 8 °C |
| 11 | RDT with reader | <b>Procalcitonin</b>             |  | VedaLab (France)        | quantitative      | NA   | 15 min | serum plasma whole blood | NA     | NA       |
| 12 | RDT with reader | <b>PCT FREND</b>                 |  | NanoEntek               | quantitative      | NA   | NA     | serum plasma             | 35 µL  | 2~8 °C   |

|    |                 |                                    |                                                                                     |                      |              |    |        |                          |        |         |
|----|-----------------|------------------------------------|-------------------------------------------------------------------------------------|----------------------|--------------|----|--------|--------------------------|--------|---------|
| 13 | RDT with reader | <b>Standard F PCT</b>              |    | SD Biosensor (Korea) | quantitative | NA | 15 min | serum plasma whole blood | 100 µL | 2-30°C  |
| 14 | RDT with reader | <b>Quantitative PCT Rapid test</b> |    | Biopanda (UK)        | quantitative | NA | NA     | NA                       | NA     | 2-30°C  |
| 15 | RDT with device | <b>ichroma PCT test</b>            |    | ichroma (Austria)    | quantitative | NA | 13 min | serum plasma whole blood | 10 µL  | NA      |
| 16 | RDT with device | <b>AFIAS PCT assay</b>             |    | Boditech Med (Korea) | quantitative | NA | 13 min | serum plasma whole blood | 10 µL  | 2-8 °C  |
| 17 | RDT with device | <b>PCT Rapid Quantitative Test</b> |  | Lansionbio (China)   | quantitative | NA | NA     | serum plasma whole blood | NA     | 4-30 °C |
| 18 | RDT with device | <b>FineCare PCT</b>                |  | WondFo (China)       | quantitative | NA | 15 min | serum plasma whole blood | NA     | NA      |

|    |                 |                        |                                                                                   |                                |              |       |        |                          |       |          |
|----|-----------------|------------------------|-----------------------------------------------------------------------------------|--------------------------------|--------------|-------|--------|--------------------------|-------|----------|
| 19 | RDT with device | InCliNA PCT            |  | SugenTech (Korea)              | quantitative | NA    |        | serum plasma whole blood | NA    | NA       |
| 20 | RDT with device |                        |  | Savant Biotechnologies (China) | quantitative | NA    |        | serum plasma whole blood | NA    | NA       |
| 21 | RDT with device | B·R·A·H·M·S PCT-Direct |  | ThermoFisher Scientific        | Quantitative | 15.06 | 20 min | whole blood              | 20 µL | 2 – 8 °C |

**Table S1: Detailed overview of point of care tests for PCT available on the market.** On-line search for PCT tests was done between May and July 2019. RDTs (rapid diagnostic test) without or with a reader (handheld, < 0.800 kg) or a device (bench model, > 0,800 kg) for qualitative detection; semi-quantitative or quantitative detection. NA: data not available.
